# Supplementary material for: ELTD1 promotes invasion and metastasis by activating MMP2 in colorectal cancer
Source: PubMed Central journal article supplement (PMC8375227; doi:10.7150/ijbs.62293), 2021-07-13
Supplement: ijbsv17p3048s1.pdf [file ijbsv17p3048s1.pdf]

# Supplementary Figure 1

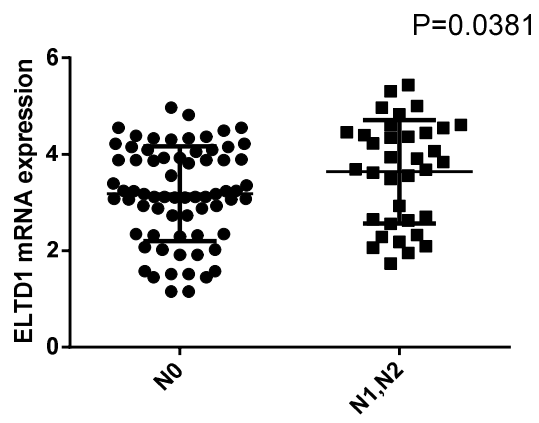

# Supplementary Figure 2

## A

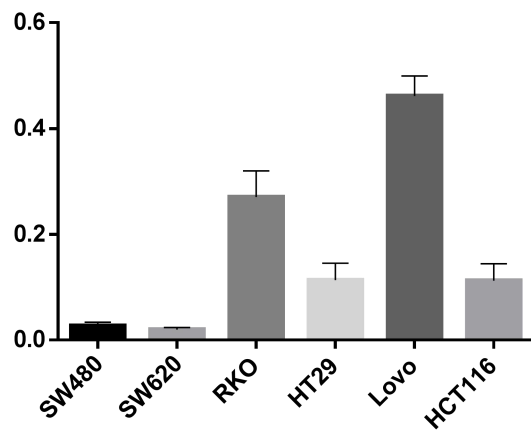

## B

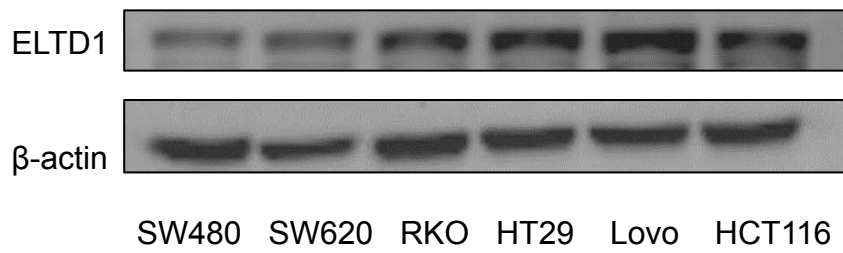

# Supplementary Figure 3

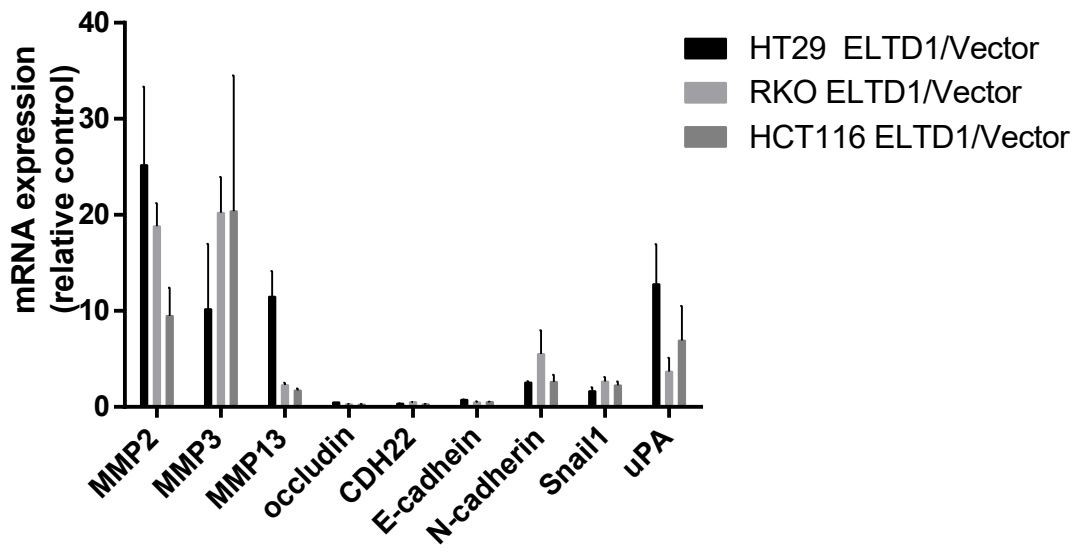

**Supplementary Figure 1** mRNA expression of ELTD1 in CRC tissues with different N stages. (n=77)

**Supplementary Figure 2 (A, B)** The mRNA and protein expression levels of ELTD1 in wild-type CRC cells were measured by qRT-PCR and Western blotting. The results are shown as the mean  $\pm$  standard deviation (SD) of three independent experiments.

**Supplementary Figure 3** mRNA expression levels of invasiveness-related genes in CRC cells were measured after ELTD1 overexpression. The results are shown as the mean  $\pm$  standard deviation (SD) of three independent experiments.
